# Supplementary material for: Cellulose–Amine Porous Materials: The Effect of Activation Method on Structure, Textural Properties, CO2 Capture, and Recyclability
Source: MDPI journal article supplement (doi:10.3390/molecules29051158), 2024-03-05
Supplement: s1 [file s1]

**Table S1.** The identification of notable mass decreases of the hydrothermal APCs in particular temperature intervals.

|                   |                   | Water                        |                       |                             | Amine                        |                       | Cellulose                    |                       |
|-------------------|-------------------|------------------------------|-----------------------|-----------------------------|------------------------------|-----------------------|------------------------------|-----------------------|
|                   | Thermal stability | Temperature interval 1. / °C | Mass decrease / wt. % | Stability after dehydration | Temperature interval 2. / °C | Mass decrease / wt. % | Temperature interval 3. / °C | Mass decrease / wt. % |
| <b>C</b>          | 58.8              | 58.8-136.9                   | 7.6                   | 136.9-288.0                 | X                            | X                     | 288.0-511.0                  | 92.4                  |
| <b>C+DETA</b>     | 43.5              | 43.5-115.2                   | 5.0                   | 115.2-265.3                 | 265.3-332.3                  | 22.1                  | 332.3-508.9                  | 72.9                  |
| <b>C+BAPE</b>     | 53.8              | 53.8-134.1                   | 8.5                   | 134.1-254.8                 | 254.8-341.4                  | 25.4                  | 341.4-542.2                  | 66.1                  |
| <b>C+MELA</b>     | 39.9              | 39.9-163.3                   | 11.1                  | 163.3-315.7                 | 315.7-380.1                  | 20.4                  | 380.1-517.4                  | 68.5                  |
| <b>C+DETA (P)</b> | X                 | X                            | X                     | 115.2-265.3                 | 265.3-332.3                  | 22.7                  | 332.3-508.9                  | 77.3                  |
| <b>C+BAPE (P)</b> | X                 | X                            | X                     | 134.1-254.8                 | 254.8-341.4                  | 27.1                  | 341.4-542.2                  | 72.9                  |
| <b>C+MELA (P)</b> | X                 | X                            | X                     | 163.3-315.7                 | 315.7-380.1                  | 22.7                  | 380.1-517.4                  | 77.3                  |
